# Supplementary material
Source: PubMed Central journal article supplement (PMC2949010)
Supplement: pp.110.157610_1.pdf [file pp.110.157610_1.pdf]

## Supporting data

### A gain-of-function mutation in the *Arabidopsis* disease resistance gene

### *RPP4* confers sensitivity to low temperature

Xiaozhen Huang, JianYong Li, Xiaoyan Zhang and ShuhuaYang

A

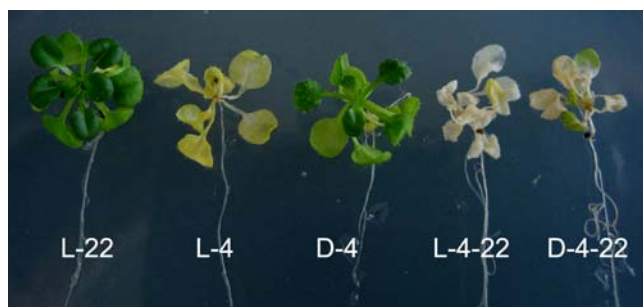

B

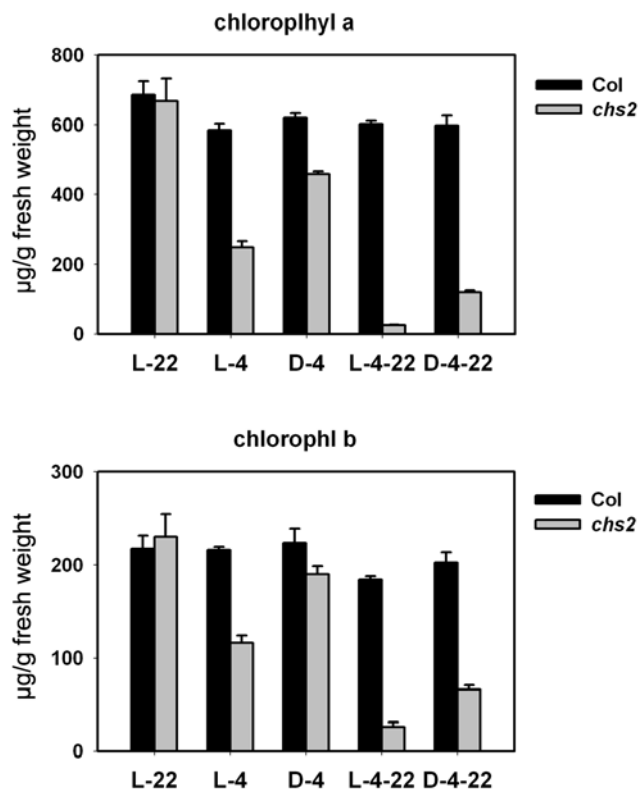

**Fig. S1** The effect of light on *chs2* phenotype at cold stress. Plants were grown at

22°C for 3 weeks (L-22) and then treated at 4°C for 6 d under light (L-4) or dark (D-4), followed by transfer to 22°C for 10 d under light (L-4-22) or dark (D-4-22).

A. *chs2* phenotypes at different light conditions.

B. Chlorophyll content in wild type and *chs2* plants at different light conditions. The data represent the means of three replicates  $\pm$  SD.

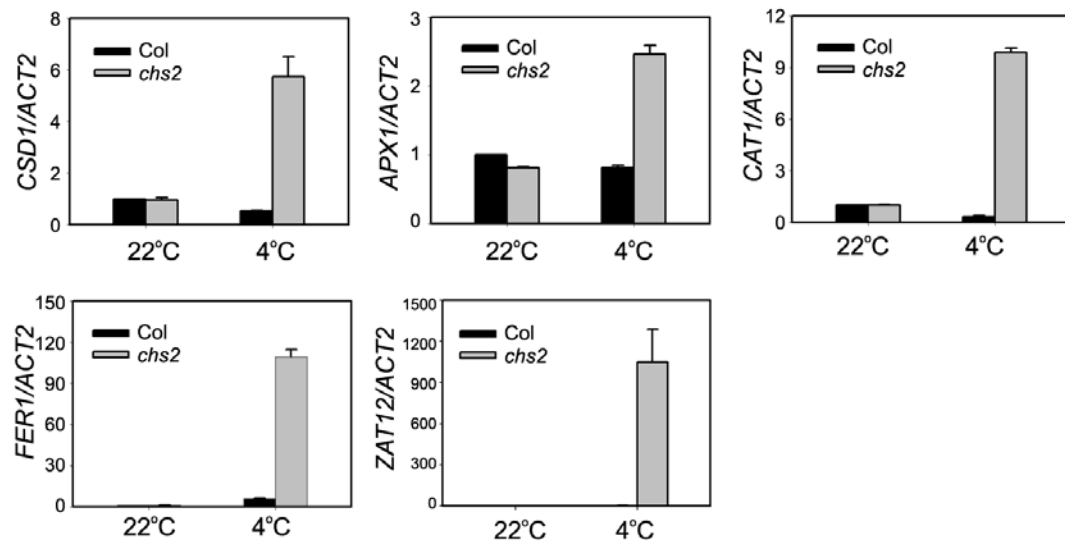

**Fig. S2** Expression of ROS-associated genes in *chs2* plants under cold stress. Wild-type Col and *chs2* plants were grown at 22°C for three weeks and then treated at 4°C for 6 d. The data represent the means of three replicates  $\pm$  SD. All experiments were repeated three times with similar results.

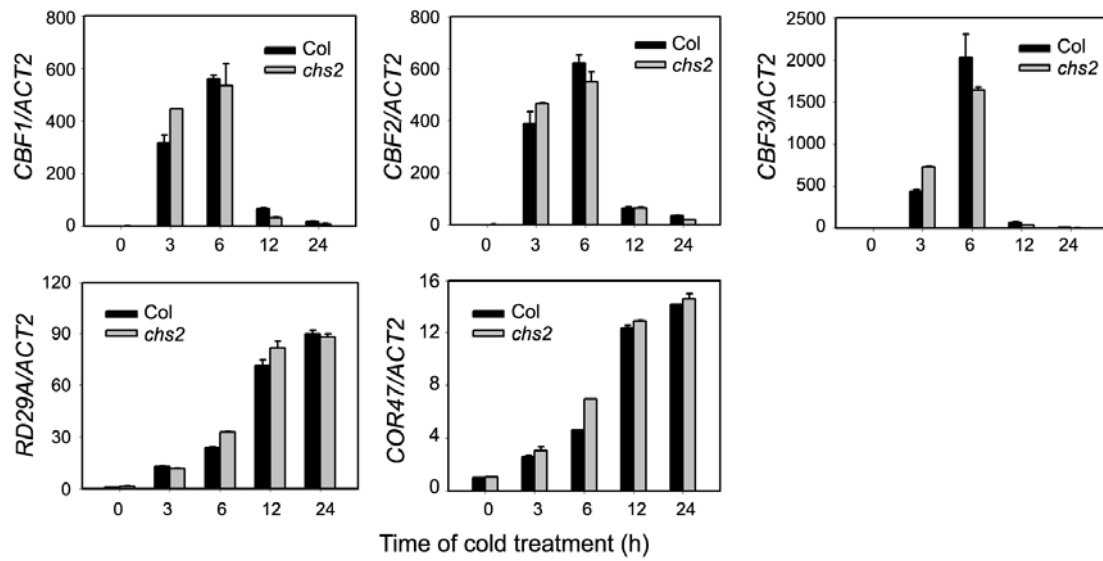

**Fig. S3** Relative mRNA levels of cold responsive genes in *chs2*. Two-week-old seedlings grown at 22°C were treated at 4°C for the indicated times. Transcription levels were determined by quantitative real-time PCR. The data represent the means of three replicates  $\pm$  SD. Similar results were observed in at least three independent experiments.

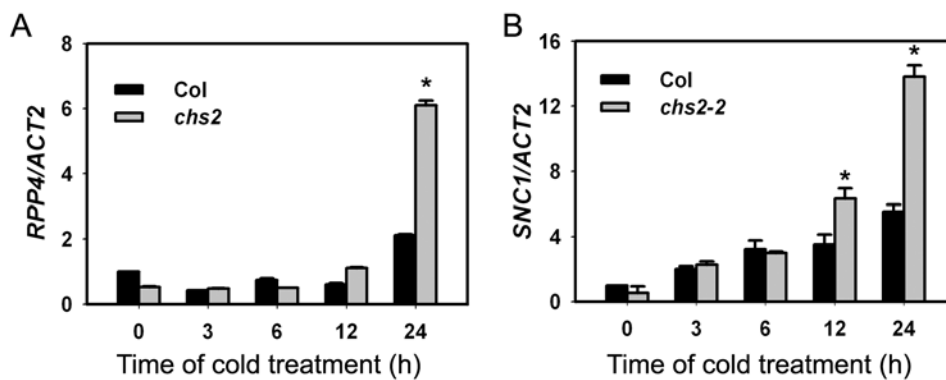

**Fig S4.** Expression of *RPP4* and *SNC1* in *chs2* at cold stress. Three-week-old 22°C-grown plants were treated at 4°C for the indicated times. The data represent the means of three replicates  $\pm$  SD. \* $P < 0.01$  (*t*-test), significant difference from Col. All experiments were repeated three times with similar results.

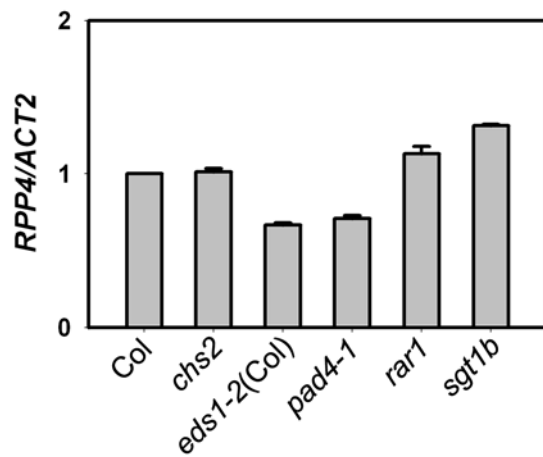

**Fig. S5.** Expression of *RPP4* in *eds1*, *pad4*, *rar1*, and *sgt1b* mutants. Total RNA was isolated from two-week-old seedlings grown at 22°C. Transcription levels were determined by quantitative real-time PCR. The data represent the means of three replicates  $\pm$  SD. Similar results were observed in three independent experiments.

**Table S1.** Gene-specific primers used in this study.

| <b>Primer name</b>            | <b>Primer sequence</b>            |
|-------------------------------|-----------------------------------|
| For cloning and genotyping    |                                   |
| CHS2-1F                       | 5'-GCCTACTGAAGCGTTTATGGT-3'       |
| CHS2-1R                       | 5'-AGTAAATGAGGCCTTGAGTGCC-3'      |
| CHS2-2F                       | 5'-GATTGACCTTGTATATGAGGTGG-3'     |
| CHS2-2R                       | 5'-CACTCATCTTTGTCCCTTCCTTTTGAA-3' |
| CHS2-p1F                      | 5'-CTGGTTGAACTCATAATGGAGGA -3'    |
| CHS2-p1R                      | 5'-GGGAGACGATAGAGGGAAGCTCAG -3'   |
| For quantitative PCR analysis |                                   |
| CBF1-1                        | 5'-GCATGTCTCAACTTCGCTGA-3'        |
| CBF1-2                        | 5'-ATCGTCTCCTCCATGTCCAG-3'        |
| CBF2-1                        | 5'-TGACGTGTCCTTATGGAGCTA-3'       |
| CBF2-2                        | 5'-CTGCACTCAAAAACATTTGCA-3'       |
| CBF3-1                        | 5'-GATGACGACGTATCGTTATGGA-3'      |
| CBF3-2                        | 5'-TACACTCGTTTCTCAGTTTACAAAC-3'   |
| RD29A-F                       | 5'-GCCGAGAAACTTCAGATTGG-3'        |
| RD29A-R                       | 5'-CCATTCTCCTCCTCCTTTC-3'         |
| COR47-1                       | 5'-CAGTGTCCGAGAGTGTGGTG-3'        |
| COR47-2                       | 5'-ACAGCTGGTGAATCCTCTGC-3'        |
| ZAT12-F                       | 5'-GGCGGCGAATTGTTTGATGCTTTT-3'    |
| ZAT12-R                       | 5'-CCCATCGGAAACTCCACTCCACAT-3'    |
| APX1-F                        | 5'-TCGCATGGCACTCTGCTGGAAC-3'      |
| APX1-R                        | 5'-CACCAGTAACTTCAACGGCCAC-3'      |
| CAT1-F                        | 5'-ACCTGTTGGTTCGCTTGGTCTTGA-3'    |
| CAT1-R                        | 5'-GGTGAGCACATTTAGGGGCATTA-3'     |
| FER1-F                        | 5'-CACTACTCCCTCACGGCTCTGCTT-3'    |
| FER1-R                        | 5'-CGTTGTATTCCACATTGATTTGCTC-3'   |
| CSD1-R                        | 5'-GATGCTAATCGACATGCTGGTGATC-3'   |
| CSD1-F                        | 5'-CTGGAGACCAATGATGCCGCAAG-3'     |
| PR1-F                         | 5'-CACATCCGAGTCTCACTGAC-3'        |
| PR1-R                         | 5'-CAGACTCATACTCTGGTG-3'          |
| PR2-F                         | 5'-AAGGAGCTTAGCCTCACCAC-3'        |
| PR2-R                         | 5'-CACAACGTCCGATGGACTTG-3'        |
| q16860-1R                     | 5'-GAAGGCACTCAAGGCCTCATTIAC-3'    |
| q16860-1F                     | 5'-GACAATAATCCCACCATAGCCTT-3'     |
| qSNC1-F                       | 5'-ATGGAGATAGCTTCTTCTCTG          |
| qSNC1-R                       | 5'-AAGCTCTTCAATCATGGCTGCT-3'      |
| ACTIN2-F                      | 5'-GGTAACATTGTGCTCAGTGGTGG-3'     |
| ACTIN2-R                      | 5'-AACGACCTTAATCTTCATGCTGC-3'     |
